# Supplementary material for: Compartmentalization and persistence of dominant (regulatory) T cell clones indicates antigen skewing in juvenile idiopathic arthritis
Source: eLife journal article supplement (doi:10.7554/elife.79016), 2023-01-23

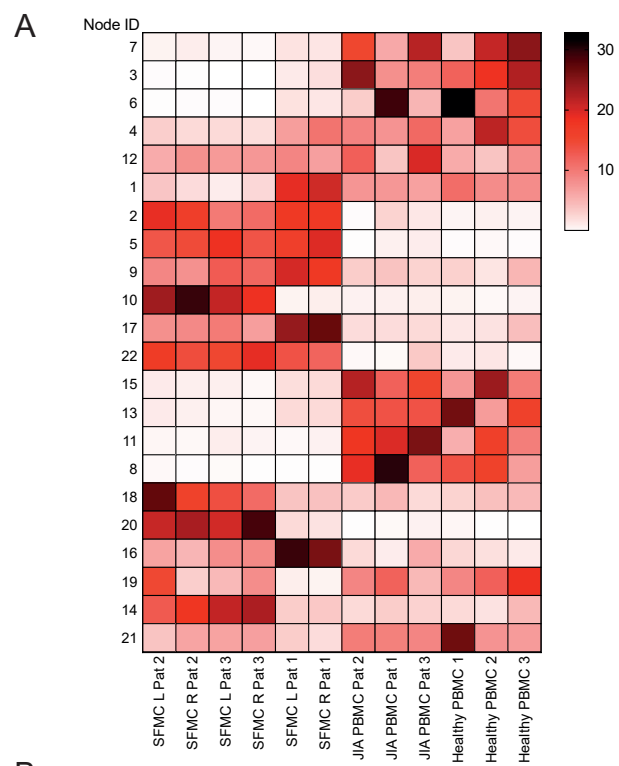

| Node | Lineage                              | Node Phenotype                                              |
|------|--------------------------------------|-------------------------------------------------------------|
| 7    | CD3 + CD4 +<br>CD45RA + Teff         | CD28 +                                                      |
| 3    |                                      | CD28 +                                                      |
| 6    |                                      | CD28 +                                                      |
| 4    | CD3 + CD4 +<br>CD45RA low Teff       | CD28 + CXCR5 int                                            |
| 12   |                                      | CD28 + CXCR3 low CCR6 low LAG3 int                          |
| 1    | CD3 + CD4 + Treg<br>(CD25 + FoxP3 +) | CD45RA int CTLA4 - CD28 +                                   |
| 2    |                                      | CD45RA - CTLA4 + CD28 + ICOS + HLA-DR +<br>PD1 low Ki67 low |
| 5    | CD3 + CD4 +<br>CD45RA - Teff         | CTLA4 + PD1 + CD28 + ICOS + HLA-DR + TNFA + IL-21 +         |
| 9    |                                      | CD28 + IL-6 +                                               |
| 10   |                                      | CTLA4 + PD1 low CD28 + TNFA + IFNg +                        |
| 17   | CD3 + CD8 +<br>CD45RA -              | CD28 + IFNg + CD103 + GB int                                |
| 22   | CD3 + CD8 +<br>CD45RA +              | CD11b + CD69 +                                              |
| 15   |                                      | CD28 +                                                      |
| 13   |                                      | CD28 +                                                      |
| 11   |                                      | HLA-DR + CXCR5 + CCR6 + CD45RA + LAG3 int                   |
| 8    |                                      | HLA-DR + CXCR5 + CCR6 + CD45RA + LAG3 low                   |
| 18   |                                      | HLA-DR + LAG3 + CD103 +                                     |
| 20   |                                      | CD11b low CD45RA + GB int CD69 +                            |
| 16   |                                      | CD11b low CD45RA +                                          |
| 19   |                                      | CD14 + CD11b +                                              |
| 14   |                                      | CD28 + TNFA + IFNg + GB +                                   |
| 21   |                                      | CD45RA + IFNg + GB + Perforin +                             |

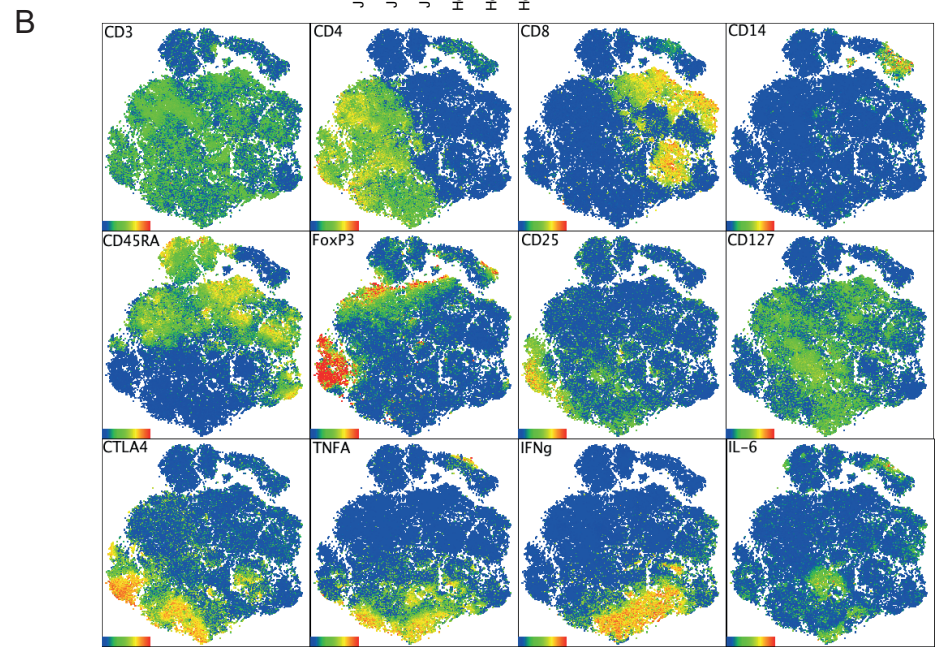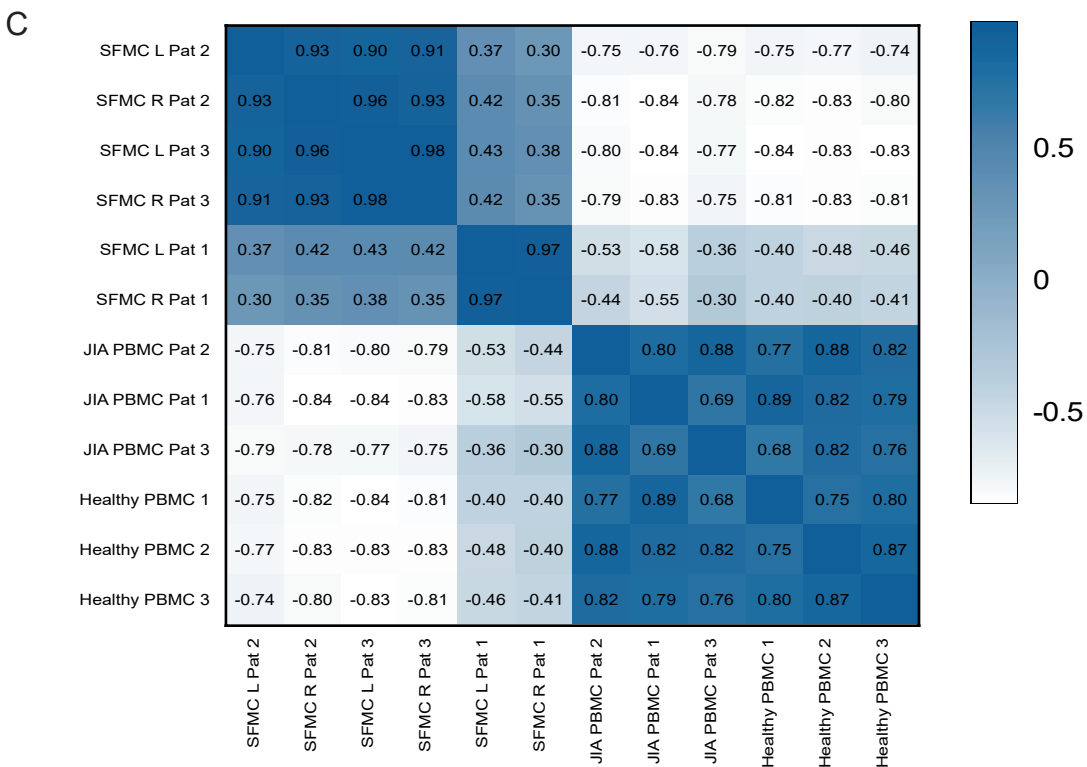

Supplement: supp [file elife-79016-supp-v1.zip]
