# Supplementary material for: Compartmentalization and persistence of dominant (regulatory) T cell clones indicates antigen skewing in juvenile idiopathic arthritis
Source: eLife. 2023 Jan 23;12:e79016. doi: 10.7554/eLife.79016 (PMC9995115; doi:10.7554/eLife.79016)
Supplement: Supplementary file 1. [file elife-79016-supp1.xlsx]

## Sheet: Sheet1
Analysis	ID	Tissue	Diagnosis	Sex	Age at (first) sample	Disease duration (years)	Medication
CyTOF	Patient 1	SF and PB	Oligoarticular JIA	Female	12.7	10.7	Eyedrops (steroids)
CyTOF and TCR-seq spatial	Patient 2	SF and PB	Polyarticular JIA	Male	8.9	2.4	Methotrexate + depot
CyTOF and TCR-seq spatial	Patient 3	SF	Polyarticular JIA	Male	10.7	2.8	Methotrexate + depot
CyTOF	Patient 3	PB	Oligoarticular JIA	Female	3.2	0.4	Methotrexate
CyTOF	Healthy 1	PB	-	Male	14.6493	-	-
CyTOF	Healthy 2	PB	-	Female	15.4247	-	-
CyTOF	Healthy 3	PB	-	Male	14.9589	-	-
TCR-seq spatial and time	Patient 1	SF and PB	Extended oligoarthritis	Female	18.1	11.9	NSAIDs, start leflunomide + humira after 1st sample
TCR-seq time	Patient 2	SF	Oligoarticular JIA	Male	16.9507	11.3	NSAIDs, start Methotrexate after 1st sample
TCR-seq time	Patient 3	SF	Oligoarticular JIA	Male	13.5068	1.4	NSAIDs, start humira after 1st sample
TCR-seq time	Patient 4	SF	Extended oligoarthritis	Female	17.2219	14.2	Methotrexate, start NSAIDs after 1st sample
TCR-seq time	Patient 5	SF and PB	Oligoarticular JIA	Female	16.4301	10.7	NSAIDs, start leflunomide after 1st sample
