# Supplementary material for: Compartmentalization and persistence of dominant (regulatory) T cell clones indicates antigen skewing in juvenile idiopathic arthritis
Source: eLife. 2023 Jan 23;12:e79016. doi: 10.7554/eLife.79016 (PMC9995115; doi:10.7554/eLife.79016)
Supplement: Supplementary file 2. [file elife-79016-supp2.xlsx]

## Sheet: Table 1
Supplemental table 2. Overview of the T cell panel with 37 markers
Targets	Metal Channel	Clone	Antibody Vendor/Catalogue number
Lineage markers
CD3	139	UCHT1	Biolegend (300402)
CD4	148	SK3	Biolegend (344625)
CD8	144	SK1	Biolegend (344727)
CD11b	161	ICRF44	Biolegend (301302)
CD16	209	3G8	Fluidigm (3209002B)
CD14	112/114	M5E2	Biolegend (301843)
T helper subsets
IL-4	156	8D4-8	Biolegend (500707)
IFN-g	168	B27	Biolegend (506513)
IL-17A	169	BL168	Biolegend (512302)
IL-21	151	3A4-N2	Biolegend (513009)
CD161	157	HP-3G10	Biolegend (339902)
T cell functional marker
CD45RA	171	HI100	Biolegend (304102)
CD69	176	FN50	Biolegend (310902)
CD28	146	CD28.2	Biolegend (302923)
CD152 (CTLA4)	155	BNI3	Biolegend (555851)
CD154 (CD40L)	149	24-31	Biolegend (310835)
HLA-DR	143	L243	Biolegend (307612)
LAG3	159	17B4	Abcam (ab40466)
PD1	147	EH12.2H7	Biolegend (329941)
Ki67	166	20Raj1	Thermofisher/ebioscience (14-5699-82)
ICOS	154	C398.4A	Biolegend (313512)
CD31	172	WM59	Biolegend (303102)
CD103	142	B-Ly7	Thermofisher/ebioscience (14-1038-82)
Chemokine receptors
CXCR3	163	G025H7	Biolegend (353718)
CXCR5	160	RF8B2	BD biosciences (552032)
CCR5	145	NP-6G4	Abcam (ab115738)
CCR6	170	G034E3	Biolegend (353402)
Treg markers
CD25	150	M-A251	BD biosciences (555429)
CD127	153	A019D5	Biolegend (351302)
FoxP3	165	PCH10L	Thermofisher/ebioscience (14-4776-82)
GITR	164	621	Biolegend (311602)
TGF-B (LAP)	175	TW4-2F8	Biolegend (349602)
IL-10	158	JES3-9D7	Biolegend (501402)
Cytokines/Enzymes
TNF-alpha	152	Mab11	Biolegend (502902)
IL-6	162	MQ2-13A5	Thermofisher/ebioscience (16-7069-85)
Granzyme B	173	CLB-GB11	Abcam (ab103159)
Perforin	174	B-D48	Abcam (ab47225)
Barcodes
CD45-A	89	HI30	Fluidigm (3089003B)
CD45-B,C or D	115, 141, 167	HI30	Biolegend (304002)
Live/Dead /Singlets
DNA (Singlets)	191/193	Nil	Fluidigm Cell-ID Intercalator-Ir (201192
Cisplatin (Live/Dead)	195	Nil	Sigma-aldrich (479306-1G)
