# Supplementary figures and images for: Compartmentalization and persistence of dominant (regulatory) T cell clones indicates antigen skewing in juvenile idiopathic arthritis
Source: eLife journal article supplement (doi:10.7554/elife.79016), 2023-01-23

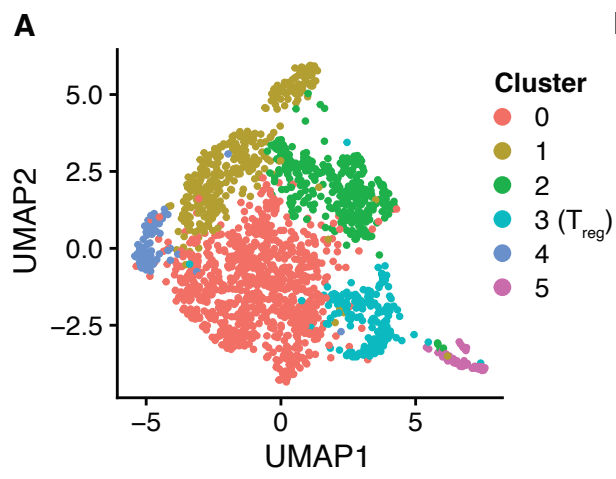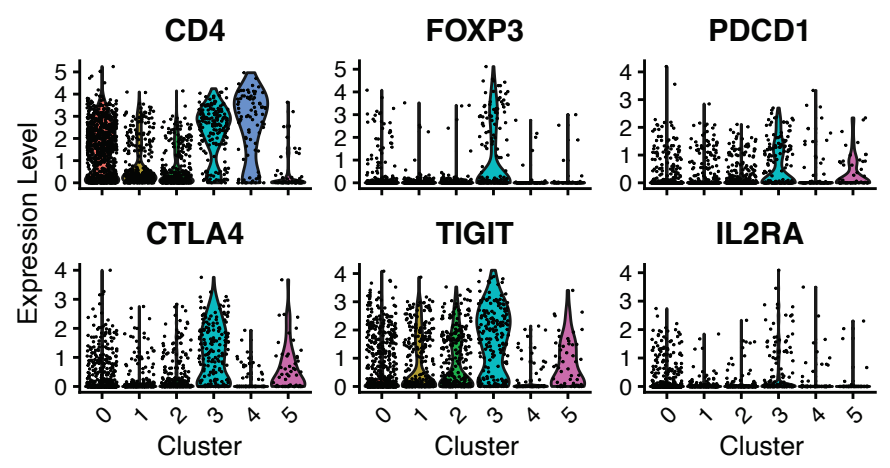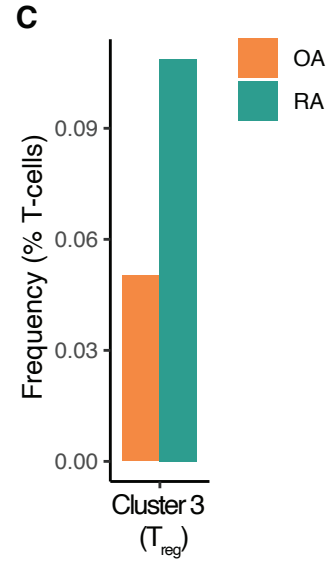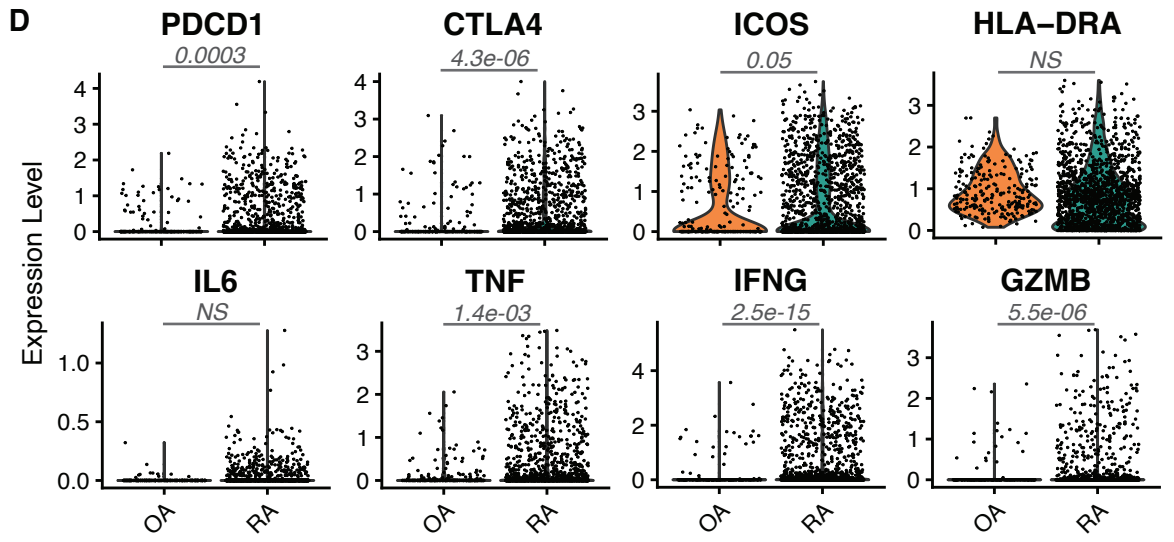

Supplement: supp [file elife-79016-supp-v1.zip]

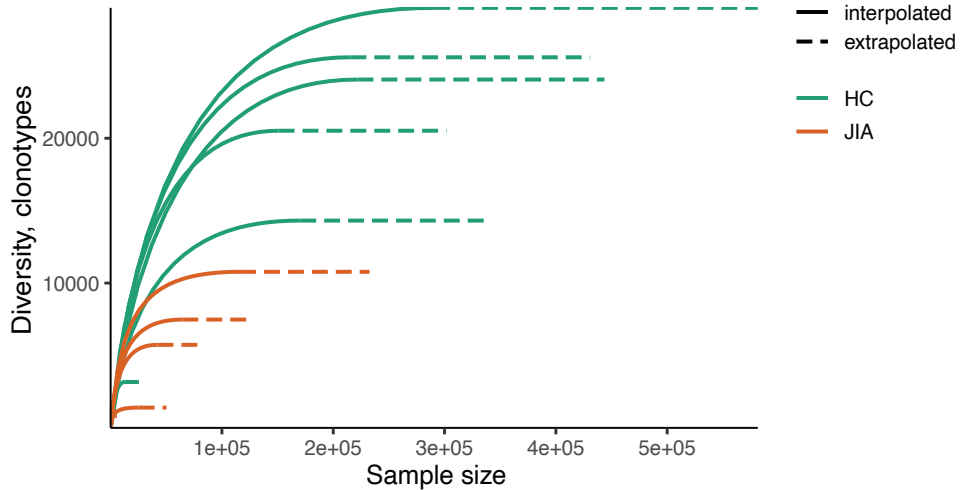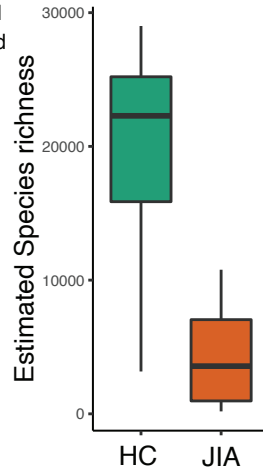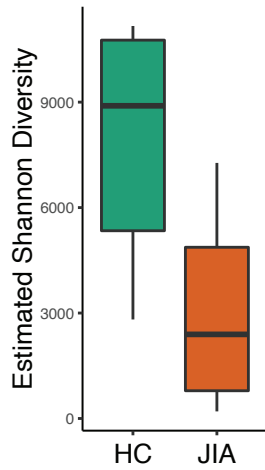

Supplement: supp [file elife-79016-supp-v1.zip]

A

Patient 1

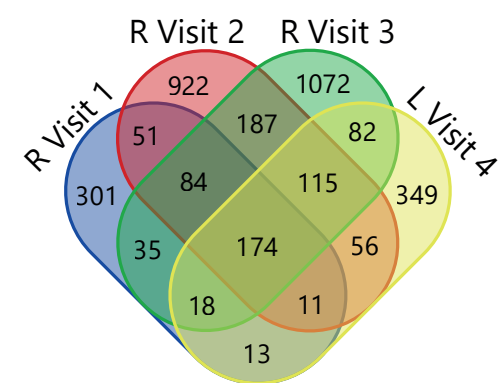

Patient 2

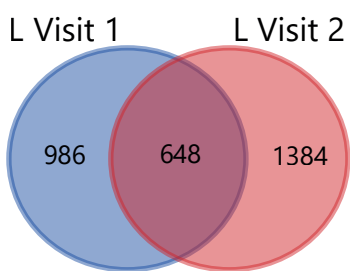

Patient 3

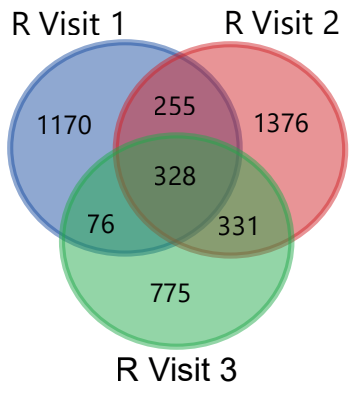

Patient 4

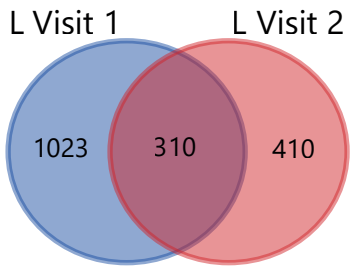

Patient 5

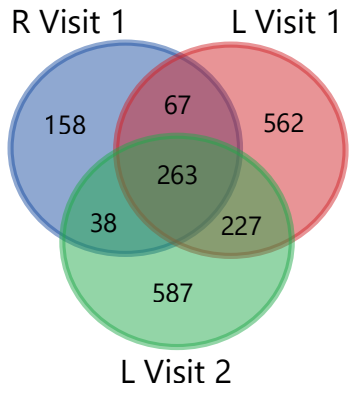

B

Patient 1

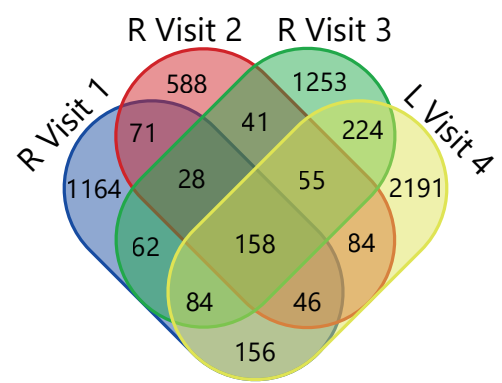

Patient 2

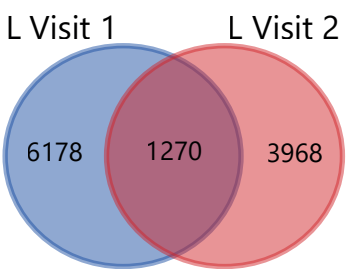

Patient 3

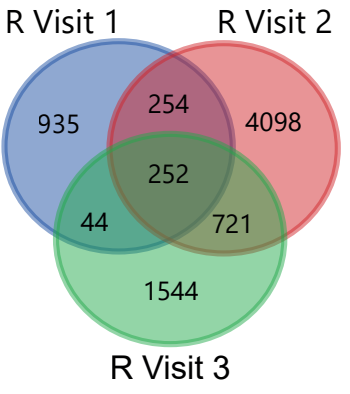

Patient 4

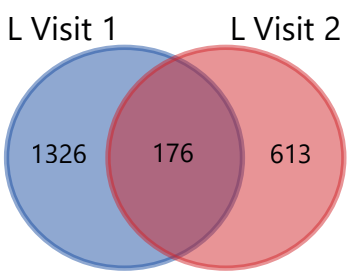

Patient 5

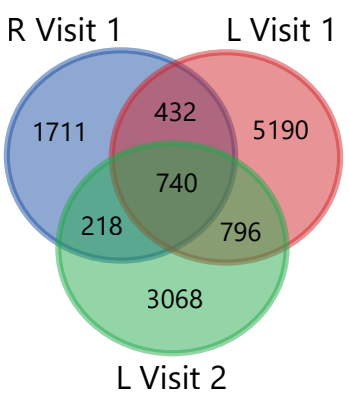

Supplement: supp [file elife-79016-supp-v1.zip]

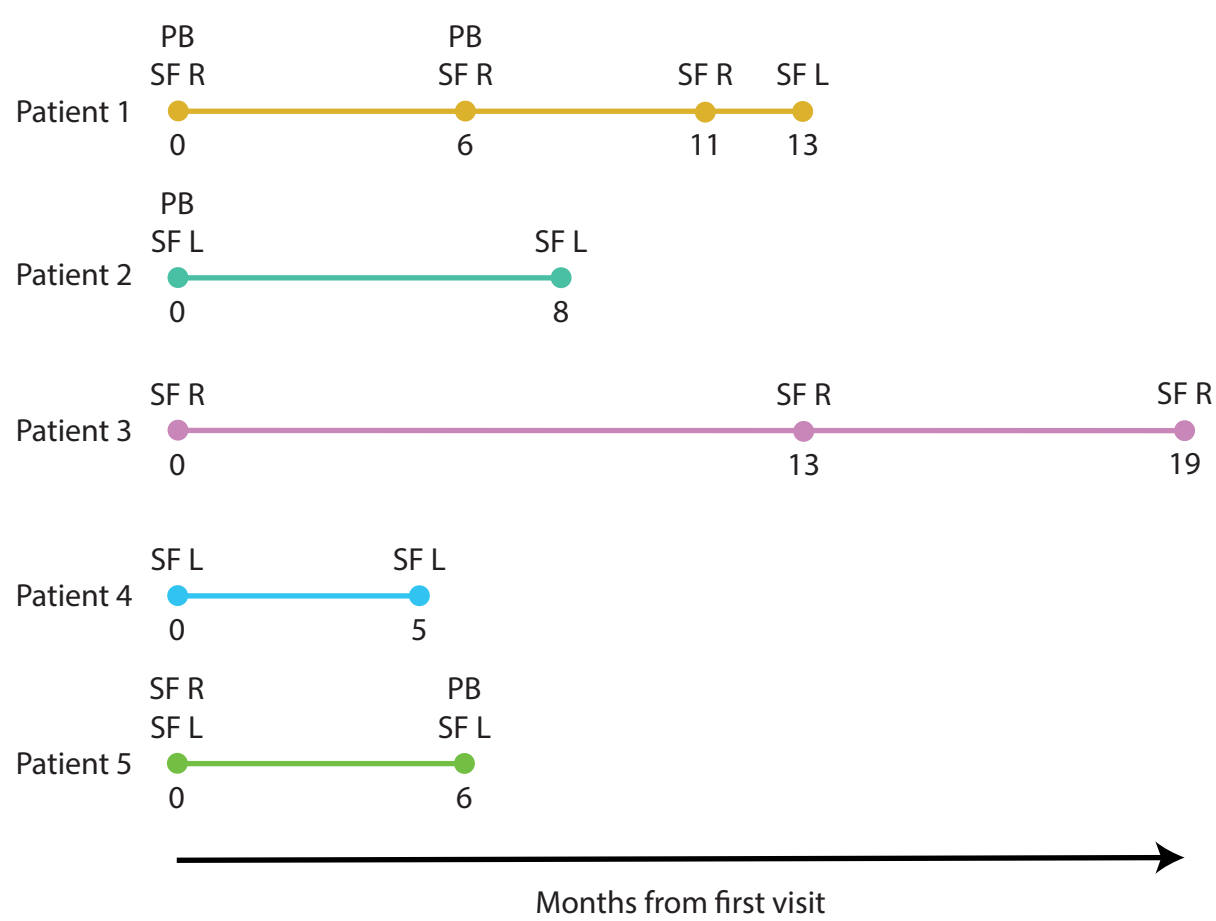

Supplement: supp [file elife-79016-supp-v1.zip]

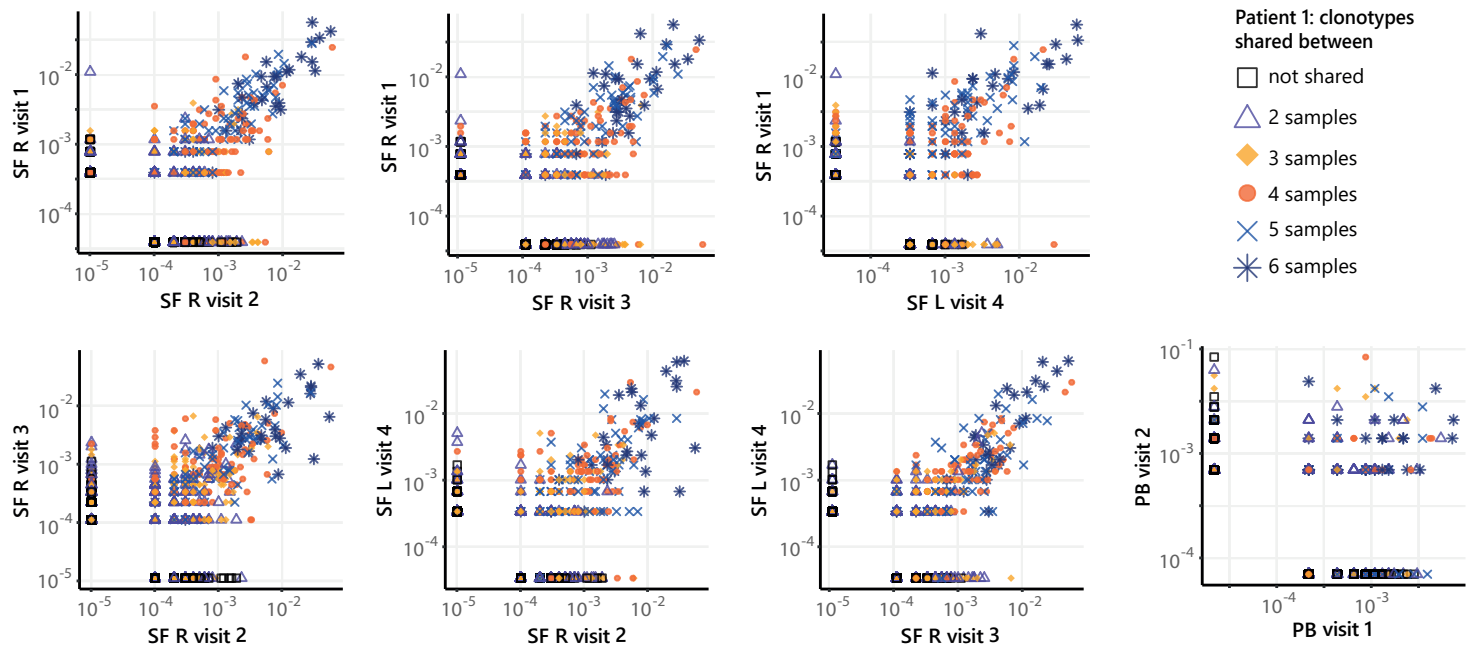

Supplement: supp [file elife-79016-supp-v1.zip]

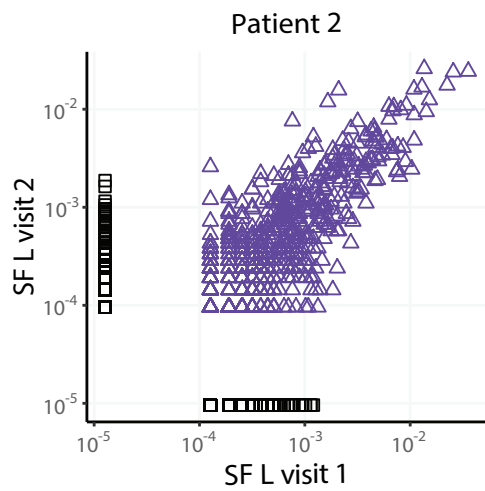

Clonotypes  
shared between

- not shared
- △ 2 samples
- ◆ 3 samples

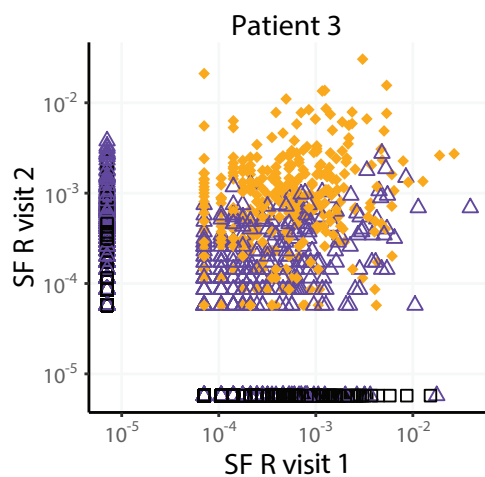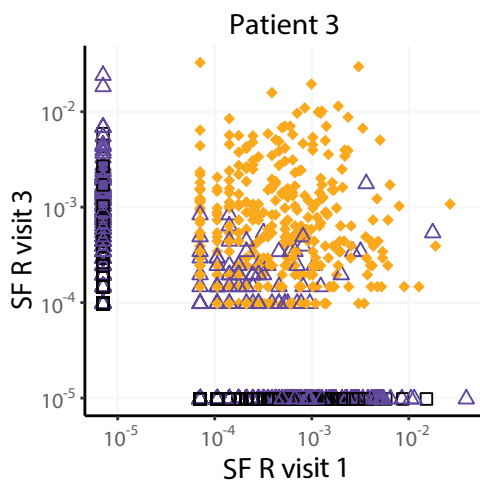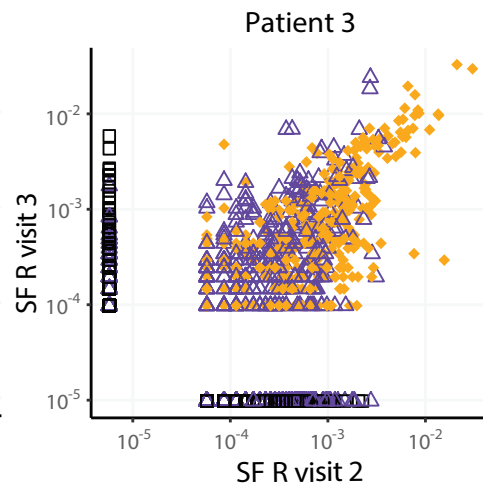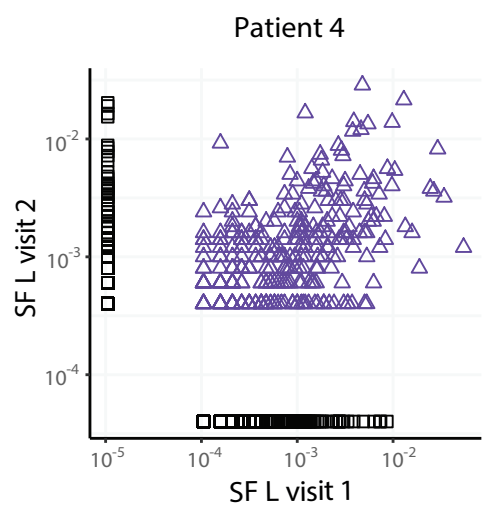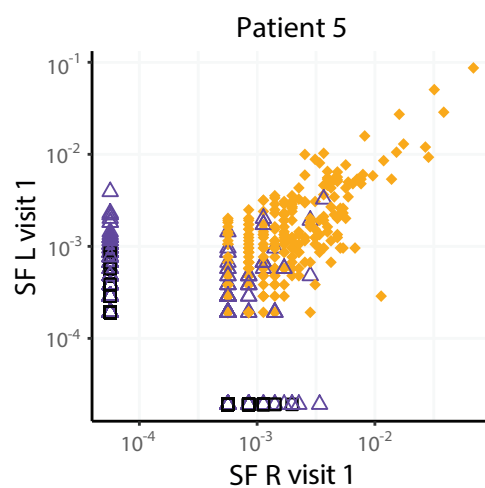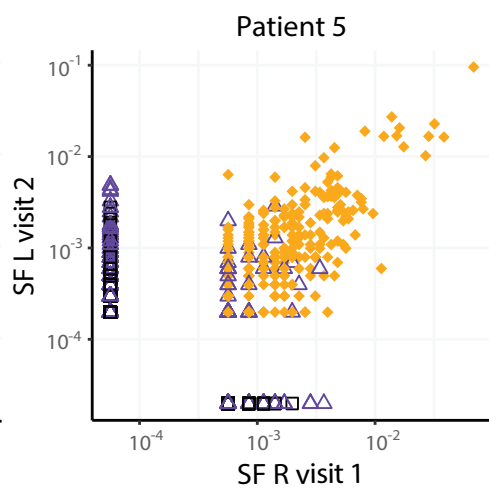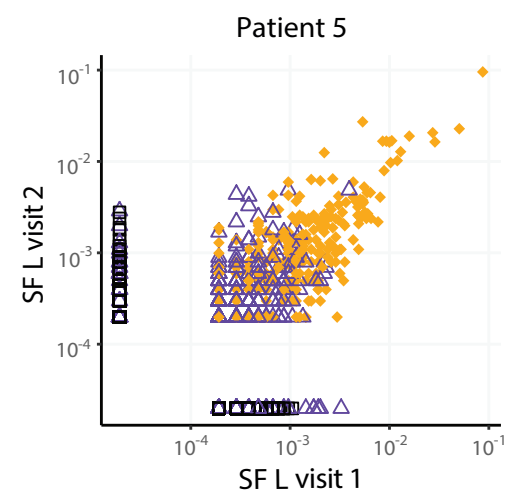

Supplement: supp [file elife-79016-supp-v1.zip]

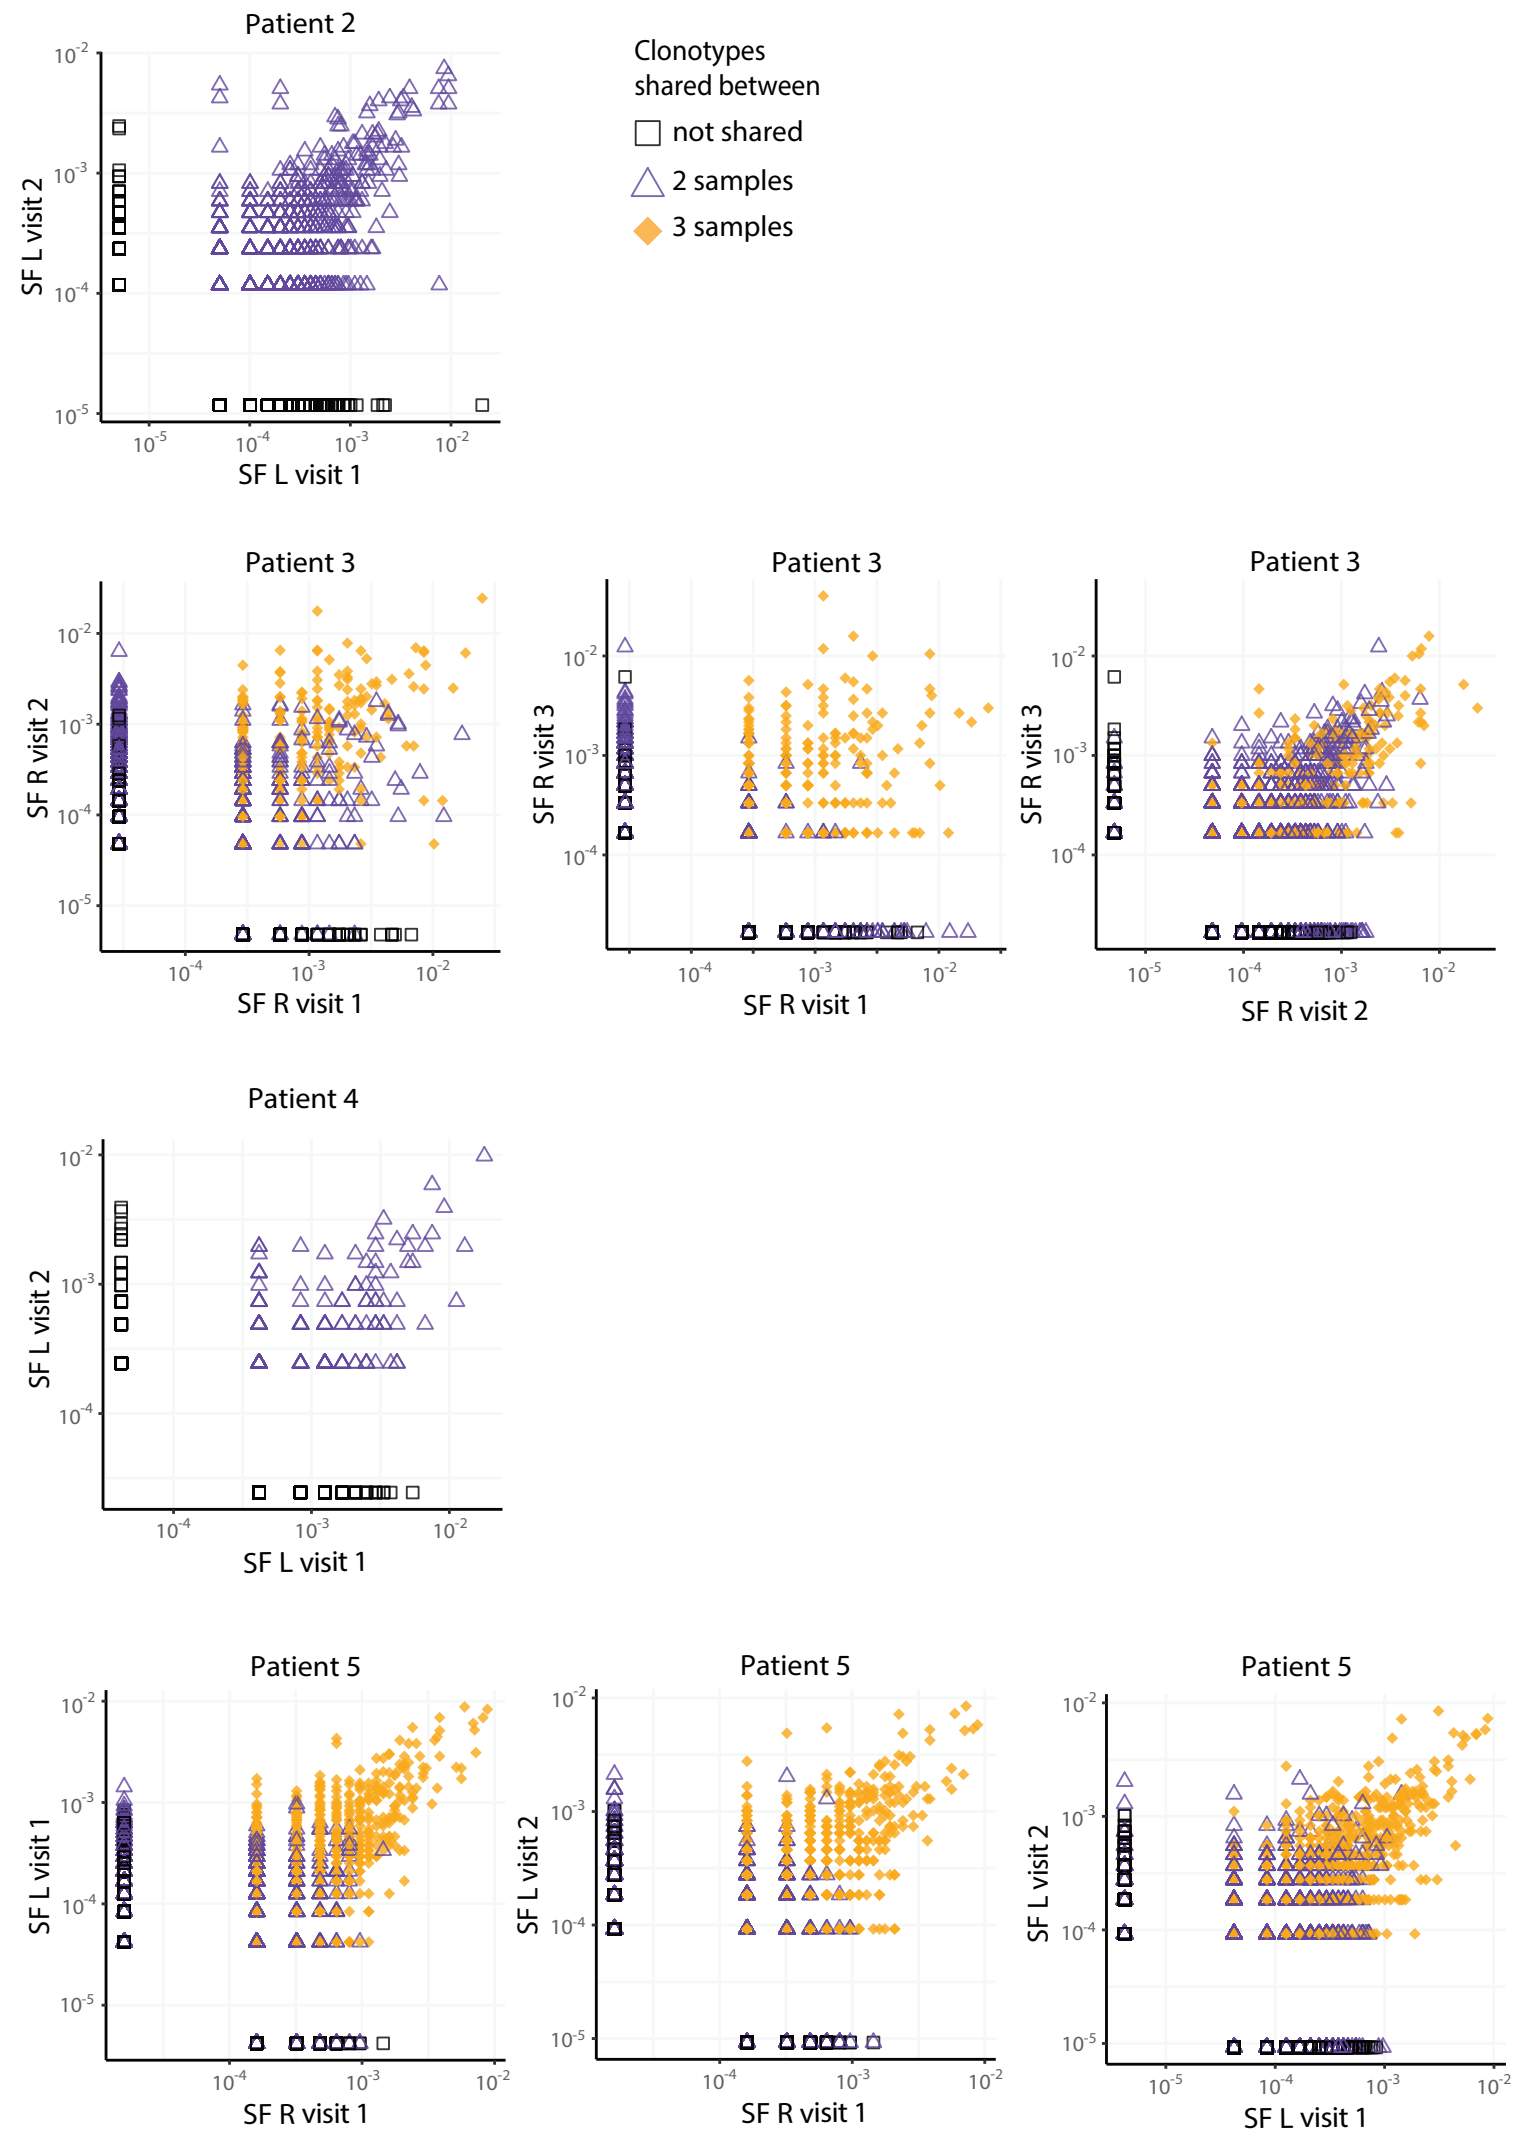

Supplement: supp [file elife-79016-supp-v1.zip]

A

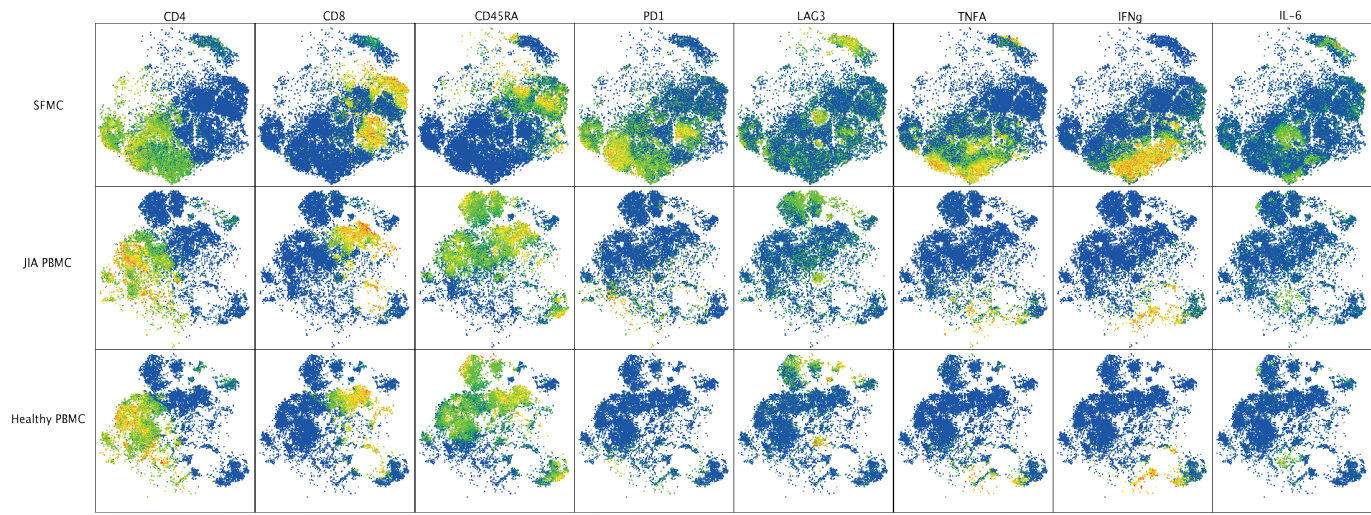

B

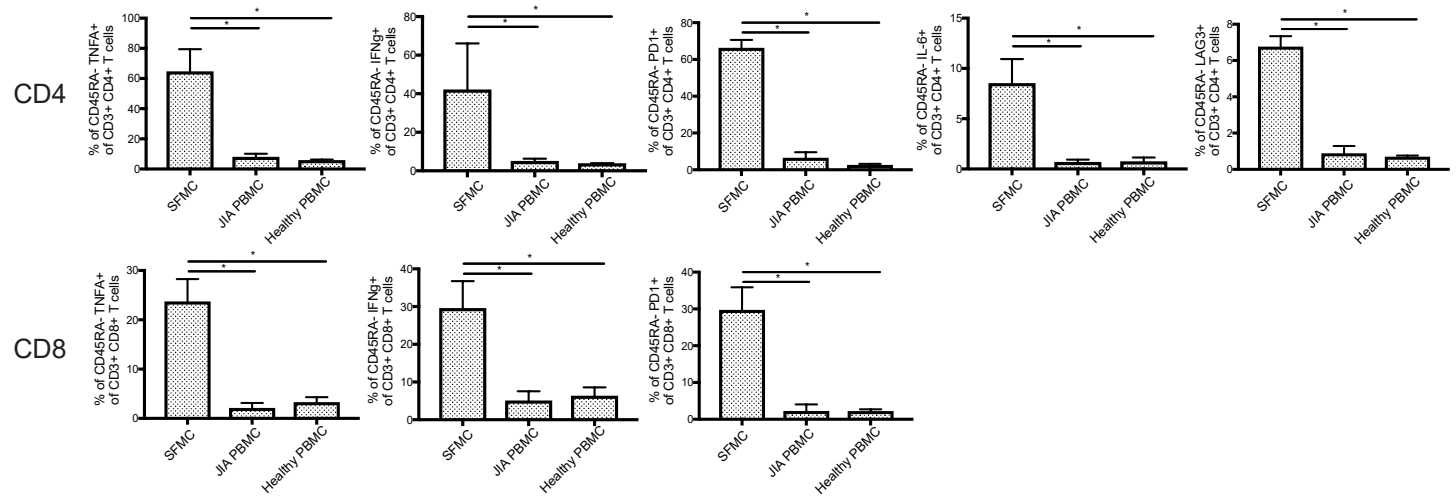

C

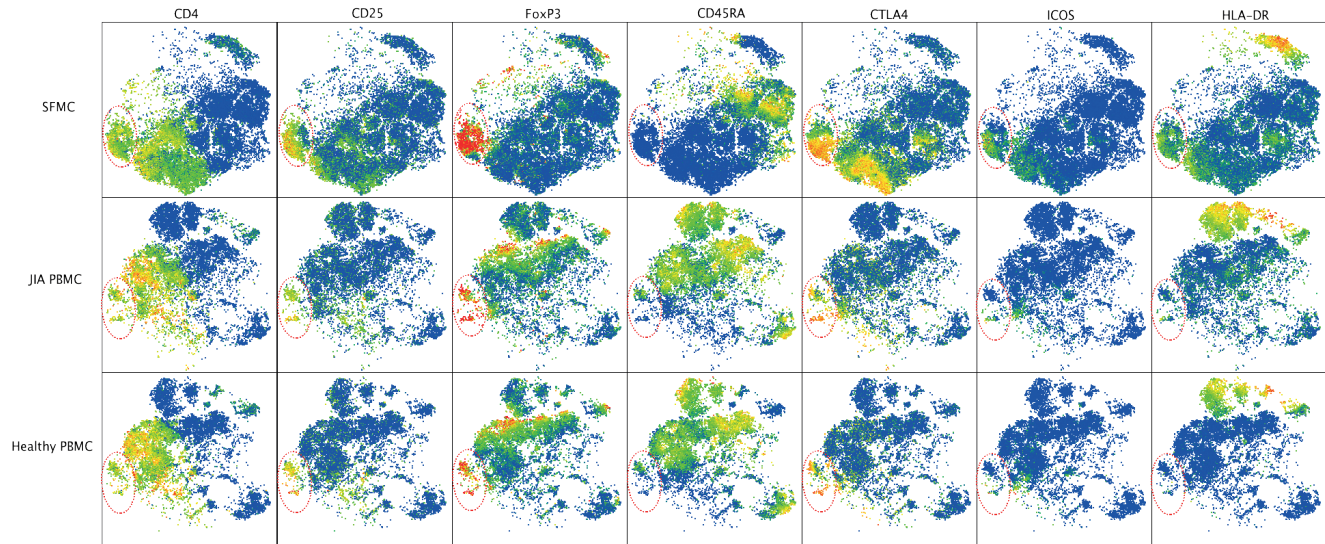

D

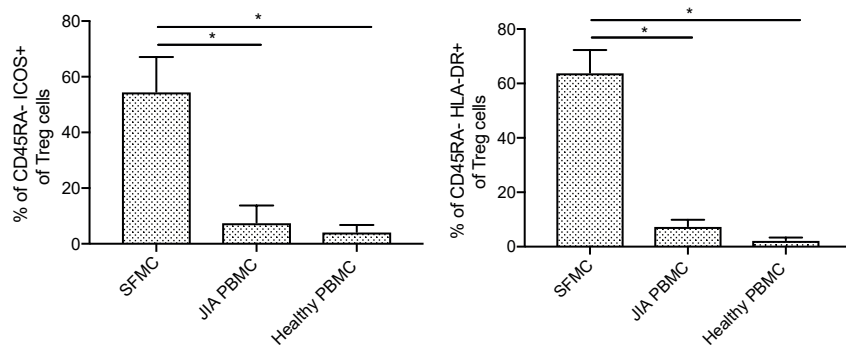

E

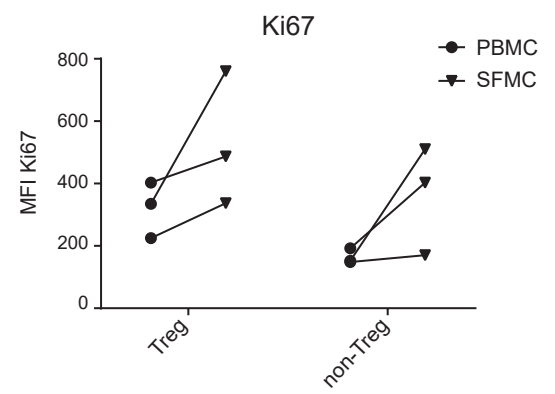

Supplement: supp [file elife-79016-supp-v1.zip]
